# Supplementary material for: Experience with polyethylene glycol allergy‐guided risk management for COVID‐19 vaccine anaphylaxis
Source: PubMed Central journal article supplement — Allergy. 2021 Dec 4;77(7):2200–10. doi: 10.1111/all.15183 (PMC9011687; doi:10.1111/all.15183), 2021-12-04
Supplement: ALL-77-2200-s002.pdf [file ALL-77-2200-s002.pdf]

# How to proceed in case of positive allergy history prior to COVID-19 mRNA vaccination?

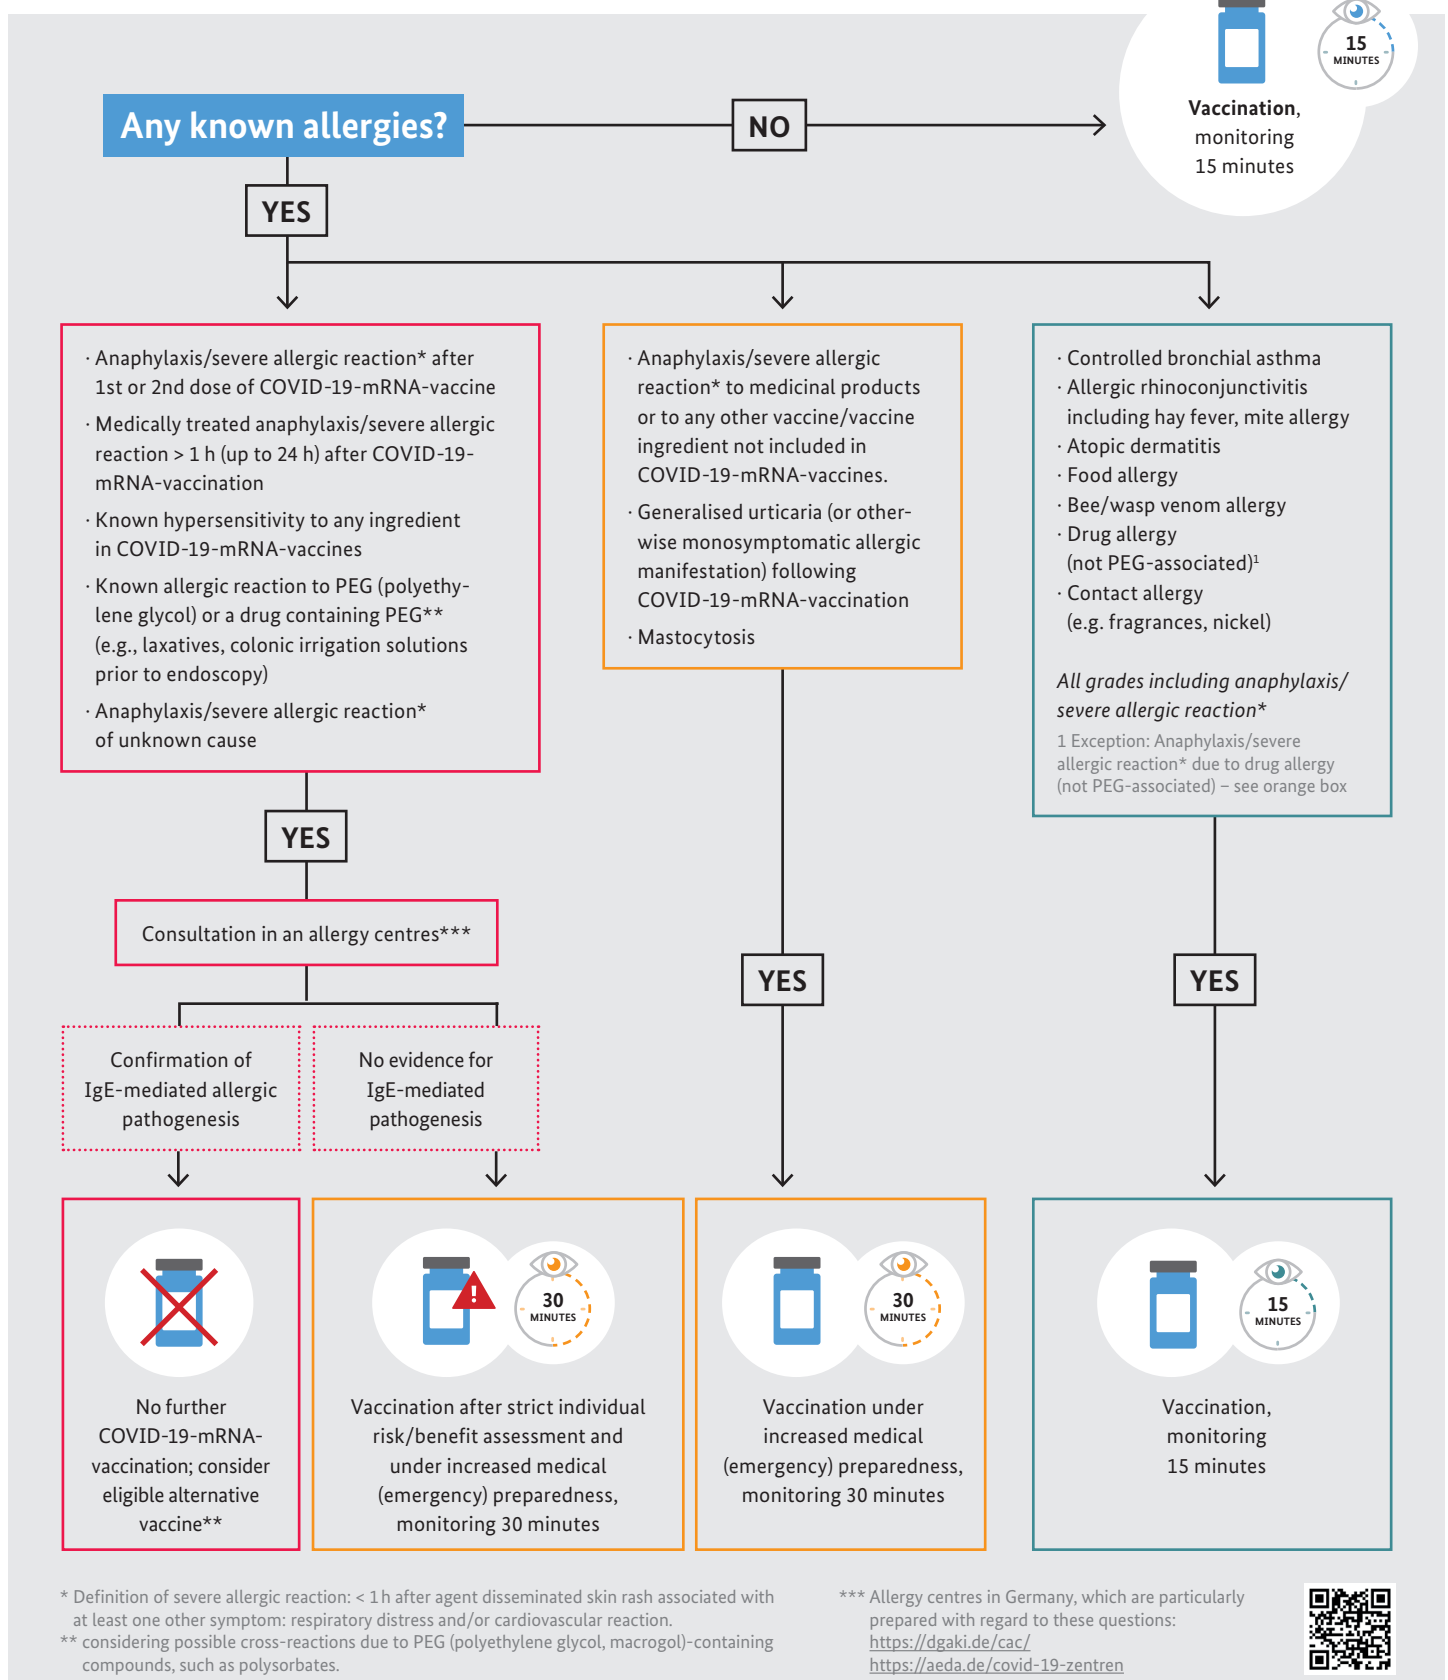

## General considerations

- After other immediate reactions (e.g. vaso-vagal reactions or panic attacks), vaccination may be given under increased emergency preparedness and monitoring for 30 minutes.
- Vaccination centres or mobile vaccination teams must be equipped with emergency equipment to treat any anaphylactic reactions that may occur.

This flowchart was provided by the Paul-Ehrlich-Institut ([www.pei.de](http://www.pei.de)) and Robert Koch Institute ([www.rki.de](http://www.rki.de)) in cooperation with the scientific societies AEDA, DGAKI, NORA and DDG and is protected by copyright. It may only be reproduced and passed on within the scope of its purposes for non-commercial use. Any editing or alteration is prohibited.

Version 1 (as of 25.03.2021)
